# Supplementary material
Source: ML conference proceedings conference paper supplement (https://proceedings.mlr.press/v48/kasiviswanathan16.html)
Supplement: Supplementary file [file kasiviswanathan16-supp.pdf]

---

# Supplementary Material for ‘Efficient Private Empirical Risk Minimization for High-dimensional Learning’

---

**Shiva Prasad Kasiviswanathan**

Samsung Research America, Mountain View, CA 94043

KASIVISW@GMAIL.COM

**Hongxia Jin**

Samsung Research America, Mountain View, CA 94043

HONGXIA.JIN@SAMSUNG.COM

## A. Proof of Claim 2.1

**Proof of Claim 2.1.** Consider  $\theta_a, \theta_b \in \mathcal{C}$ ,  $\mathbf{x} \in \mathbb{R}^d$  with  $\|\mathbf{x}\| \leq 1$ ,  $y \in \mathbb{R}$  with  $|y| \leq 1$ ,

$$\begin{aligned} & |\ell(\langle \mathbf{x}, \theta_a \rangle; y) - \ell(\langle \mathbf{x}, \theta_b \rangle; y)| \\ &= |\ell(\langle \mathbf{x}, \theta_a \rangle; y) - \ell(\langle \mathbf{x}, \theta_a \rangle + \langle \mathbf{x}, \theta_b - \theta_a \rangle; y)| \\ &\leq |\lambda_\ell \langle \mathbf{x}, \theta_b - \theta_a \rangle| \leq \lambda_\ell \|\theta_a - \theta_b\|. \end{aligned}$$

Since this holds for every  $\mathbf{x}$  and  $y$  in the chosen domain, this completes the proof.  $\square$

## B. Missing Proofs from Section 3

**Proof of Lemma 3.3.** We first investigate the function  $\ell(\langle \Phi \mathbf{x}_i, \vartheta \rangle; y_i)$ . Consider  $\vartheta_a, \vartheta_b \in \Phi \mathcal{C}$ ,

$$\begin{aligned} & |\ell(\langle \Phi \mathbf{x}_i, \vartheta_a \rangle; y_i) - \ell(\langle \Phi \mathbf{x}_i, \vartheta_b \rangle; y_i)| \\ &= |\ell(\langle \Phi \mathbf{x}_i, \vartheta_a \rangle; y_i) - \ell(\langle \Phi \mathbf{x}_i, \vartheta_a \rangle + \langle \Phi \mathbf{x}_i, \vartheta_b - \vartheta_a \rangle; y_i)| \\ &\leq |\lambda_\ell \langle \Phi \mathbf{x}_i, \vartheta_b - \vartheta_a \rangle|. \end{aligned}$$

Using Theorem 3.1, if

$$m = \Theta((\psi^4/\gamma^2) \max\{\log n, \log(1/\beta)\}),$$

then with probability at least  $1 - \beta$ ,  $\|\Phi \mathbf{x}_i\| \leq (1 + \gamma)\|\mathbf{x}_i\| \leq 2\|\mathbf{x}_i\| \leq 2$ . Therefore, with probability at least  $1 - \beta$ ,

$$|\ell(\langle \Phi \mathbf{x}_i, \vartheta_a \rangle; y_i) - \ell(\langle \Phi \mathbf{x}_i, \vartheta_b \rangle; y_i)| \leq 2\lambda_\ell \|\vartheta_b - \vartheta_a\|.$$

Taking a union bound over all  $i$ 's, with probability at least  $1 - \beta n$ , for all  $i \in [n]$ ,  $|\lambda_\ell \langle \Phi \mathbf{x}_i, \vartheta_b - \vartheta_a \rangle| \leq 2\lambda_\ell \|\vartheta_b - \vartheta_a\|$ .

Replacing  $\beta$  by  $\beta/n$  gives the proof.  $\square$

**Proof of Lemma 3.4.** If  $S$  is the set of points  $\mathbf{x}_1, \dots, \mathbf{x}_n, \hat{\theta}$ , then as mentioned above  $w(S) = O(\sqrt{\log n})$ . For any  $i \in [n]$ , using Corollary 3.2, with probability at least  $1 - \beta$ ,

$$\ell(\langle \Phi \mathbf{x}_i, \Phi \hat{\theta} \rangle; y_i) \leq \ell(\langle \mathbf{x}_i, \hat{\theta} \rangle; y_i) + \lambda_\ell \gamma \|\mathcal{C}\|_2. \quad (5)$$

Taking a union bound over all  $i$ 's and replacing  $\beta$  by  $\beta/n$  completes the proof.  $\square$

**Proof of Lemma 3.5.** Since  $\hat{\theta} \in \mathcal{C}$ , by definition,

$$\begin{aligned} & \min_{\theta \in \mathcal{C}} \mathcal{L}_{\text{comp}}(\theta; (\mathbf{x}_1, y_1), \dots, (\mathbf{x}_n, y_n); \Phi) \\ & \leq \mathcal{L}_{\text{comp}}(\hat{\theta}; (\mathbf{x}_1, y_1), \dots, (\mathbf{x}_n, y_n); \Phi). \quad (6) \end{aligned}$$

From Lemma 3.4, with probability at least  $1 - \beta$ ,

$$\begin{aligned} & \mathcal{L}_{\text{comp}}(\hat{\theta}; (\mathbf{x}_1, y_1), \dots, (\mathbf{x}_n, y_n); \Phi) \\ & \stackrel{\text{def}}{=} \frac{1}{n} \sum_{i=1}^n \ell(\langle \Phi \mathbf{x}_i, \Phi \hat{\theta} \rangle; y_i) \\ & \leq \frac{1}{n} \sum_{i=1}^n \ell(\langle \mathbf{x}_i, \hat{\theta} \rangle; y_i) + \lambda_\ell \gamma \|\mathcal{C}\|_2, \end{aligned}$$

where we used the fact that  $\|\hat{\theta}\| \leq \|\mathcal{C}\|_2$ . Using the above inequality with (6) completes the proof.  $\square$

**Proof of Proposition 3.7.** We discuss the proof for the case of  $(\epsilon, \delta)$ -differential privacy (the proof for the case of  $\epsilon$ -differential privacy proceeds similarly by using Theorem 3.6, Part 2).

Since the inputs  $\Phi \mathbf{x}_i$ 's are  $m$ -dimensional, from guarantees of Theorem 3.6 (Part 1), we know that with probability at least  $1 - \beta$ ,

$$\begin{aligned} & \frac{1}{n} \sum_{i=1}^n \ell(\langle \Phi \mathbf{x}_i, \vartheta^{\text{priv}} \rangle; y_i) - \\ & \min_{\vartheta \in \Phi \mathcal{C}} \frac{1}{n} \sum_{i=1}^n \ell(\langle \Phi \mathbf{x}_i, \vartheta \rangle; y_i) \\ & = O\left(\frac{\lambda_{\mathcal{L}_{\text{comp}}} \sqrt{m} \|\Phi \mathcal{C}\|_2 \log^{3/2}(n/\delta) \sqrt{\log(\frac{1}{\delta})} \text{polylog}(\frac{1}{\beta})}{n\epsilon}\right). \quad (7) \end{aligned}$$

Notice that by definition,

$$\begin{aligned} \min_{\vartheta \in \Phi\mathcal{C}} \frac{1}{n} \sum_{i=1}^n \ell(\langle \Phi \mathbf{x}_i, \vartheta \rangle; y_i) \\ \equiv \min_{\theta \in \mathcal{C}} \frac{1}{n} \sum_{i=1}^n \ell(\langle \Phi \mathbf{x}_i, \Phi \theta \rangle; y_i). \end{aligned}$$

Also by construction in Step 2 of Mechanism PROJERM,  $\vartheta^{\text{priv}} = \Phi \theta^{\text{priv}}$ . Substituting these two identities in (7) provides, that with probability at least  $1 - \beta$ ,

$$\begin{aligned} \frac{1}{n} \sum_{i=1}^n \ell(\langle \Phi \mathbf{x}_i, \Phi \theta^{\text{priv}} \rangle; y_i) \\ - \min_{\theta \in \mathcal{C}} \frac{1}{n} \sum_{i=1}^n \ell(\langle \Phi \mathbf{x}_i, \Phi \theta \rangle; y_i) \\ = O\left(\frac{\lambda_{\mathcal{L}_{\text{comp}}} \sqrt{m} \|\Phi\mathcal{C}\|_2 \log^{3/2}(n/\delta) \sqrt{\log(1/\delta)} \text{polylog}(1/\beta)}{n\epsilon}\right). \end{aligned}$$

Using the bound from Lemma 3.5, gives that with probability at least  $1 - 2\beta$ ,

$$\begin{aligned} \frac{1}{n} \sum_{i=1}^n \ell(\langle \Phi \mathbf{x}_i, \Phi \theta^{\text{priv}} \rangle; y_i) \\ - \min_{\theta \in \mathcal{C}} \frac{1}{n} \sum_{i=1}^n \ell(\langle \Phi \mathbf{x}_i, \Phi \theta \rangle; y_i) \\ = O\left(\frac{\lambda_{\mathcal{L}_{\text{comp}}} \sqrt{m} \|\Phi\mathcal{C}\|_2 \log^{3/2}(n/\delta) \sqrt{\log(1/\delta)} \text{polylog}(1/\beta)}{n\epsilon}\right) \\ + O(\lambda_\ell \gamma \|\mathcal{C}\|_2). \end{aligned}$$

Replacing  $\beta$  by  $\beta/2$  completes the proof.  $\square$

**Proof of Lemma 3.10.** Consider the set  $S$  as  $\{\mathbf{x}_1, \dots, \mathbf{x}_n\} \cup \mathcal{C}$ , then  $w(S) \leq w(\mathcal{C}) + \sqrt{\log n}$ . Using an argument similar to Lemma 3.4 (based on Theorem 3.1), for  $\theta^{\text{priv}} \in \mathcal{C}$ , with probability at least  $1 - \beta$ ,

$$\begin{aligned} \mathcal{L}_{\text{comp}}(\theta^{\text{priv}}; (\mathbf{x}_1, y_1), \dots, (\mathbf{x}_n, y_n); \Phi) \\ \stackrel{\text{def}}{=} \frac{1}{n} \sum_{i=1}^n \ell(\langle \Phi \mathbf{x}_i, \Phi \theta^{\text{priv}} \rangle; y_i) \\ \geq \frac{1}{n} \sum_{i=1}^n \ell(\langle \mathbf{x}_i, \theta^{\text{priv}} \rangle; y_i) - \lambda_\ell \gamma \|\mathcal{C}\|_2. \end{aligned}$$

This implies that with probability at least  $1 - \beta$ ,

$$\begin{aligned} \mathcal{L}_{\text{comp}}(\theta^{\text{priv}}; (\mathbf{x}_1, y_1), \dots, (\mathbf{x}_n, y_n); \Phi) \\ \geq \frac{1}{n} \sum_{i=1}^n \ell(\langle \mathbf{x}_i, \theta^{\text{priv}} \rangle; y_i) - \lambda_\ell \gamma \|\mathcal{C}\|_2. \end{aligned}$$

Using the definition of  $\mathcal{L}(\theta^{\text{priv}}; (\mathbf{x}_1, y_1), \dots, (\mathbf{x}_n, y_n))$  completes the proof.  $\square$

**Proof of Theorem 3.11.** We first discuss the proof for the case of  $(\epsilon, \delta)$ -differential privacy (Part 1). Here, we set

$$\gamma = \frac{\psi \sqrt{w(\mathcal{C})}}{\sqrt{\epsilon n}},$$

and correspondingly set  $m$  as,

$$m = \Theta\left(\frac{\psi^2 \epsilon n (w(\mathcal{C}) + \sqrt{\log n})^2 \log(n/\beta)}{w(\mathcal{C})}\right).$$

With the choice of  $m$ , with probability  $1 - \beta$ , the diameter of  $\Phi\mathcal{C}$  ( $\|\Phi\mathcal{C}\|_2$ ) is at most  $(1 + \gamma)\|\mathcal{C}\|_2 \leq 2\|\mathcal{C}\|_2$ . Using this, along with Lemma 3.10 and Proposition 3.7 (Part 1) gives that with probability at least  $1 - 3\beta$ ,

$$\begin{aligned} \mathcal{L}(\theta^{\text{priv}}; (\mathbf{x}_1, y_1), \dots, (\mathbf{x}_n, y_n)) - \mathcal{L}(\hat{\theta}; (\mathbf{x}_1, y_1), \dots, (\mathbf{x}_n, y_n)) \\ = O\left(\frac{\lambda_{\mathcal{L}_{\text{comp}}} \sqrt{m} \|\mathcal{C}\|_2 \log^{3/2}(n/\delta) \sqrt{\log(1/\delta)} \text{polylog}(1/\beta)}{n\epsilon}\right) \\ + O(\lambda_\ell \gamma \|\mathcal{C}\|_2). \end{aligned}$$

Using the bound on  $\lambda_{\mathcal{L}_{\text{comp}}}$  from Lemma 3.3 gives that with probability at least  $1 - 4\beta$ ,

$$\begin{aligned} \mathcal{L}(\theta^{\text{priv}}; (\mathbf{x}_1, y_1), \dots, (\mathbf{x}_n, y_n)) - \mathcal{L}(\hat{\theta}; (\mathbf{x}_1, y_1), \dots, (\mathbf{x}_n, y_n)) \\ = O\left(\frac{\lambda_\ell \sqrt{m} \|\mathcal{C}\|_2 \log^{3/2}(n/\delta) \sqrt{\log(1/\delta)} \text{polylog}(1/\beta)}{n\epsilon}\right) \\ + O(\lambda_\ell \gamma \|\mathcal{C}\|_2). \end{aligned}$$

Replacing  $\beta$  by  $\beta/5$ , and simplifying the resulting expression completes the Part 1 of the proof.

For Part 2, we set  $\gamma = \frac{\psi^{4/3} w(\mathcal{C})^{2/3}}{(\epsilon n)^{1/3}}$  and correspondingly set  $m$  as,

$$m = \Theta\left(\frac{\psi^{4/3} (n\epsilon)^{2/3} (w(\mathcal{C}) + \sqrt{\log n})^2 \log(n/\beta)}{w(\mathcal{C})^{4/3}}\right).$$

The proof follows along the same lines as the case of  $(\epsilon, \delta)$ -differential privacy. Here we use Proposition 3.7 (Part 2).  $\square$
